# Supplementary material for: A novel “total pituitary hormone index” as an indicator of postoperative pituitary function in patients undergoing resection of pituitary adenomas
Source: PubMed Central journal article supplement (PMC5668024; doi:10.18632/oncotarget.15978), 2017-03-07
Supplement: oncotarget-08-79111-s001.pdf [file oncotarget-08-79111-s001.pdf]

## A novel “total pituitary hormone index” as an indicator of postoperative pituitary function in patients undergoing resection of pituitary adenomas

### Supplementary Material

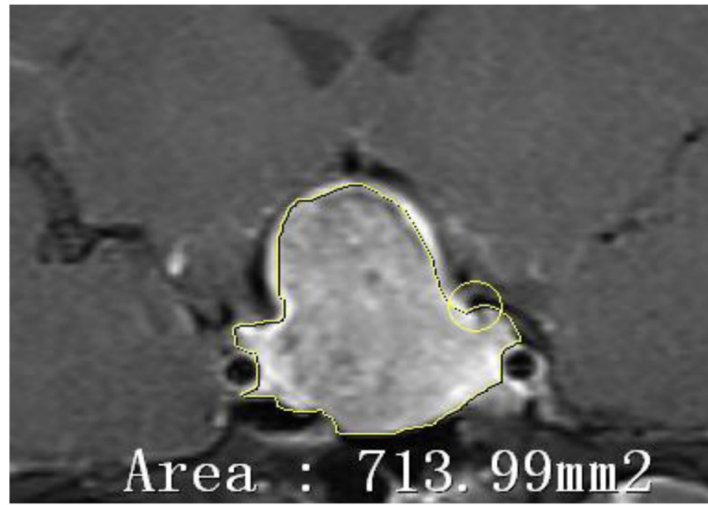

**Supplemental Figure 1.** Calculation of the tumor area on a single coronal MRI plane. The contouring region in the figure is the tumor region with area: 713.99 mm<sup>2</sup>.

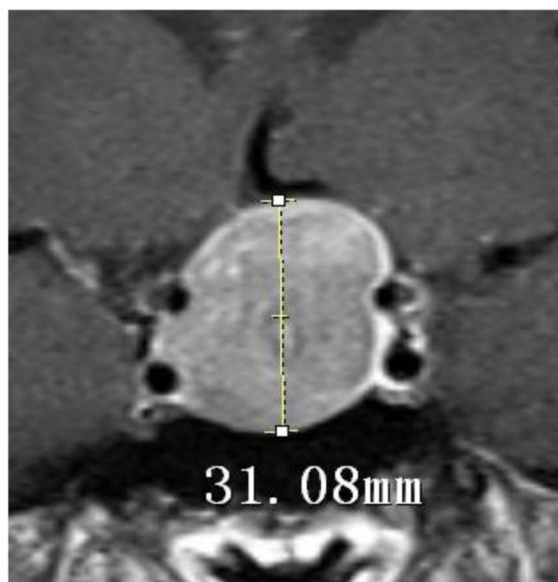

**Supplementary Figure 2.** Measurement of the maximum tumor diameter on a single coronal MRI plane.

**Supplemental Table 1.** Differences between pre- and postoperative pituitary hormone levels in 21 null-cell type NFPA patients<sup>1</sup>

| Hormone                          | Preoperative       | Postoperative Day 1                  | Postoperative Day 7                   | Postoperative Month 4                | <i>p</i>         |
|----------------------------------|--------------------|--------------------------------------|---------------------------------------|--------------------------------------|------------------|
| GH, ng/mL                        | 1.8 ± 0.8 (1 ± 0)  | 0.8 ± 0.2 (0.44 ± 0.01)              | 0.9 ± 0.3 (0.50 ± 0.01)               | 1.2 ± 0.4 (0.67 ± 0.01)              | <b>0.021</b>     |
| ACTH, ng/mL                      | 20.6 ± 5.4 (1 ± 0) | 14.7 ± 5.7 (0.71 ± 0.01)             | 11.0 ± 1.5 (0.53 ± 0.01)              | 20.1 ± 3.9 (0.98 ± 0.02)             | <b>0.035</b>     |
| TSH, ng/mL                       | 2.1 ± 0.4 (1 ± 0)  | 1.7 ± 0.7 (0.81 ± 0.02)              | 1.1 ± 0.2 (0.52 ± 0.01)               | 2.2 ± 0.3 (1.05 ± 0.02) <sup>b</sup> | <b>&lt;0.001</b> |
| PRL, ng/mL                       | 26.4 ± 5.8 (1 ± 0) | 9.4 ± 1.6 (0.36 ± 0.01) <sup>a</sup> | 9.6 ± 1.2 (0.36 ± 0.01) <sup>a</sup>  | 9.5 ± 1.4 (0.36 ± 0.01) <sup>a</sup> | <b>&lt;0.001</b> |
| FSH, ng/mL                       | 15.9 ± 4.6 (1 ± 0) | 12.1 ± 3.2 (0.76 ± 0.02)             | 11.7 ± 3.3 (0.74 ± 0.02) <sup>a</sup> | 16.5 ± 4.9 (1.04 ± 0.02)             | <b>0.011</b>     |
| LH, ng/mL                        | 7.2 ± 2.3 (1 ± 0)  | 5.5 ± 1.9 (0.76 ± 0.02)              | 5.4 ± 1.8 (0.76 ± 0.02)               | 8.9 ± 2.4 (1.24 ± 0.03) <sup>b</sup> | <b>0.003</b>     |
| Total hormone index <sup>2</sup> | 6 ± 0              | 3.8 ± 0.02                           | 3.4 ± 0.02                            | 5.3 ± 0.02                           | <b>&lt;0.001</b> |

Data are presented as estimated mean ± standard error of mean (SEM) by generalized estimation equation and (mean ratio to preoperative measurement ± SEM).

GH: growth hormone; ACTH: adrenocorticotrophic hormone; TSH: thyroid-stimulating hormone; PRL: prolactin; FSH: follicle-stimulating hormone; LH: luteinizing hormone; NA: not available; NFPA: non-functioning pituitary adenomas

<sup>1</sup> Log2 or Log10 transformation was applied.

<sup>2</sup> Total hormone index is equal to the sum of ratios of postoperative hormone levels to preoperative hormone levels.

a. Significant difference between the given time point and pre-operation, *P* < 0.05.

b. Significant difference between the given time point and Day 7, *P* < 0.05.
